# 1 Conscious processing of narrative 2 stimuli synchronizes heart rate 3 between individuals

4 Pauline Pérez\* <sup>1,2,3</sup>, Jens Madsen\* <sup>4</sup>, Leah Banellis <sup>5,6</sup>, Başak Türker<sup>1,2,3</sup>, Federico  
5 Raimondo<sup>1</sup>, Vincent Perlbarg<sup>7</sup>, Melanie Valente<sup>1</sup>, Marie-Cécile Niérat<sup>12</sup>, Louis Puybasset<sup>8,9</sup>,  
6 Lionel Naccache<sup>1,2,3,10,11</sup>, Thomas Similowski<sup>12,13</sup>, Damian Cruse<sup>5,6</sup>, Lucas C Parra<sup>#4</sup>, Jacobo  
7 D Sitt<sup>#1,2,3</sup>

8  
9 \* First authors contributed equally, #Last authors contributed equally

## 10 11 Affiliations

12 <sup>1</sup> Institut du Cerveau et de la Moelle épinière, ICM, F-75013, Paris, France.

13 <sup>2</sup> Inserm U 1127, F-75013, Paris, France.

14 <sup>3</sup> CNRS UMR 7225, F-75013, Paris, France

15 <sup>4</sup> Department of Biomedical Engineering, City College of New York, New York, USA.

16 <sup>5</sup> School of Psychology, University of Birmingham, Birmingham, B15 2TT, England

17 <sup>6</sup> Centre for Human Brain Health, University of Birmingham, Birmingham, B15 2TT, England

18 <sup>7</sup> Bioinformatics and Biostatistics Core Facility, iCONICS, IHU-A-ICM, Institut du Cerveau et  
19 de la Moelle épinière, Paris, France

20 <sup>8</sup> Department of Anesthesia and Intensive Care, Pitié-Salpêtrière Hospital, Paris, France

21 <sup>9</sup> Sorbonne Université, CNRS, INSERM, Laboratoire d'Imagerie Biomédicale, LIB, Paris,  
22 France

23 <sup>10</sup> Department of Neurophysiology, Hôpital de la Pitié-Salpêtrière, AP-HP, F-75013, Paris,  
24 France.

25 <sup>11</sup> Faculté de Médecine Pitié-Salpêtrière, Sorbonne Université, 75013, Paris, France.

26 <sup>12</sup> Sorbonne Université, INSERM, UMRS1158 Neurophysiologie Respiratoire Expérimentale  
27 et Clinique, F-75005 Paris, France

28 <sup>13</sup> AP-HP, Groupe Hospitalier Universitaire APHP-Sorbonne Université, site Pitié-Salpêtrière,  
29 Service de Pneumologie, Médecine Intensive et Réanimation (Département R3S), F-75013  
30 Paris, France

31

## 32 **Submission Type: Original Research**

33 Title Character count: 85

34 Number of Tables: 0

35 Number of Figures: 6

36 Word count of Abstract: 174

37 Word Count of Paper: 3,451

38

39

40

## 41 Abstract

42 Heart rate has natural fluctuations that are typically ascribed to autonomic function. Recent  
43 evidence suggests that conscious processing can affect the timing of the heartbeat. We  
44 hypothesized that heart rate is modulated by conscious processing and therefore dependent  
45 on attentional focus. To test this we leverage the observation that neural processes can be  
46 synchronized between subjects by presenting an identical narrative stimulus. As predicted, we  
47 find significant inter-subject correlation of the heartbeat (ISC-HR) when subjects are presented  
48 with an auditory or audiovisual narrative. Consistent with the conscious processing hypothesis,  
49 we find that ISC-HR is reduced when subjects are distracted from the narrative, and that higher  
50 heart rate synchronization predicts better recall of the narrative. Finally, patients with disorders  
51 of consciousness who are listening to a story have lower ISC, as compared to healthy  
52 individuals, and that individual ISC-HR might predict a patients' prognosis. We conclude that  
53 heart rate fluctuations are partially driven by conscious processing, depend on attentional  
54 state, and may represent a simple metric to assess conscious state in unresponsive patients.

## 55 Introduction

56 In healthy individuals, heart rate fluctuates with breathing and changes in parasympathetic and  
57 sympathetic tone<sup>1-3</sup>. Physical activity naturally increases heart rate, but also just thinking about  
58 physical activity may increase heart rate<sup>4</sup>. Similarly, mental exercises such as meditation can  
59 reduce heart rate<sup>5</sup>. The effect of cognition on heart rate is perhaps even more direct than these  
60 traditional accounts<sup>6,7</sup>. We also know that suspense and surprise can transiently increase heart  
61 rate<sup>8</sup>. Most likely these immediate effects of the mind on the heart subserved the purpose of  
62 preparing the body for imminent action<sup>9</sup>. Despite this evidence, the role of conscious  
63 perception<sup>10</sup> on heart rate is less clear. It is well established that the brain can unconsciously  
64 detect novelty in the stimulus, as demonstrated with event-related potential studies (e.g.  
65 MMN<sup>11-13</sup>, and N400<sup>14,15</sup>). Recent evidence shows that the timing of an individual heartbeat  
66 may be affected by the perception of an unexpected sound, but only when consciously  
67 perceived<sup>16</sup>. We hypothesize that conscious processing of perceptual information will affect  
68 heart rate. Therefore, we predict that fluctuations in heart rate will depend on top-down  
69 attention to the stimulus and predict memory performance, a known factor<sup>17</sup> and a correlate of  
70 conscious perception.<sup>18</sup>

71 To test these predictions we will leverage the observation that natural narrative stimuli guide  
72 cognitive processes resulting in reliable neural responses. This was first observed by  
73 measuring hemodynamic brain activity during movies: when humans watch the same movie,  
74 they have similar fluctuations in brain blood oxygenation<sup>19</sup>. Specifically, the temporal  
75 fluctuations of the signal measured with functional magnetic resonance (fMRI) are correlated  
76 between subjects. Significant inter-subject correlation of brain activity has now been observed  
77 with other neuroimaging modalities, including EEG, MEG and fNIRS<sup>10-13</sup>. Thus,  
78 neurophysiological fluctuations appear to synchronize on a wide range of time scales, from  
79 milliseconds to several minutes. This phenomenon is also not constrained to movies but has  
80 been observed for speech, music, or during driving<sup>20-22</sup>. There are even significant correlations  
81 in the spatial patterns of fMRI activity between speakers and listeners<sup>23</sup> or the time-courses of  
82 EEG signals of two individuals engaged in a conversation<sup>24</sup>. This similarity of neural activity in

83 response to narrative stimuli suggests that these stimuli elicit similar perceptual and cognitive  
84 processes in different subjects.

85 Consistent with this, inter-subject correlation crucially depends on the cognitive state of the  
86 participant. Subjects that are not attentive or do not follow the narrative show significantly  
87 reduced inter-subject correlation, both in EEG and fMRI<sup>25-27</sup>. A drop in inter-subject correlation  
88 is also observed in patients with disorders of consciousness relative to healthy controls<sup>28-30</sup>.  
89 Indeed, a cohesive narrative is crucially important to elicit synchronized brain activity in fMRI,  
90 in particular at long time scales.<sup>31</sup> It comes as no surprise then that inter-subject correlation  
91 has been found to be predictive of a variety of behavioral outcomes, such as audience  
92 retention, memory of content, efficacy of advertising, efficacy of communication and political  
93 speeches, and more<sup>23,25,32-35</sup>.

94 There are many studies reporting a correlation of physiological signals across subjects.<sup>36</sup>  
95 Generally this has been linked to physical or social interaction,<sup>37-40</sup> or at the very least a co-  
96 presence at the same place and time.<sup>41</sup> However, consistent with our hypothesis, the  
97 simultaneous experience is not crucial for synchronization. A few recent studies report a  
98 correlation of heart rate fluctuations across subjects watching the same movie at different  
99 times, and ascribe this to shared emotions elicited by the film.<sup>42,43</sup>

100 Our conscious processing hypothesis predicts that this synchronization phenomenon will occur  
101 not just for the film, but more generally for narrative stimuli, that inter-subject correlation of  
102 heart rate will be modulated by attention, that it will correlate with cognitive performance, and  
103 more dramatically, that it will be reduced in patients with disorders of consciousness. We  
104 confirm these predictions in a series of four experiments and conclude that heart rate  
105 synchronization has the potential to become a marker of cognitive state in a clinical setting.

## 106 Results

107 In all four experiments we presented narrative stimuli to each subject while recording their  
108 electrocardiogram (EKG, Figure 1A). Recordings were aligned in time between subjects and  
109 instantaneous HR was estimated as the inverse of the RR intervals (Figure 1B). Mean and  
110 standard deviation of these instantaneous measures provide HR and HR variability (HRV) for  
111 each subject. The instantaneous HR signals are upsampled to a common sampling rate and  
112 correlated between all pairs of subjects (Figure 1C). Inter-subject correlation of HR (ISC-HR)  
113 is then defined for each subject as the average Pearson's correlation with all other subjects  
114 (Figure 1D).

115

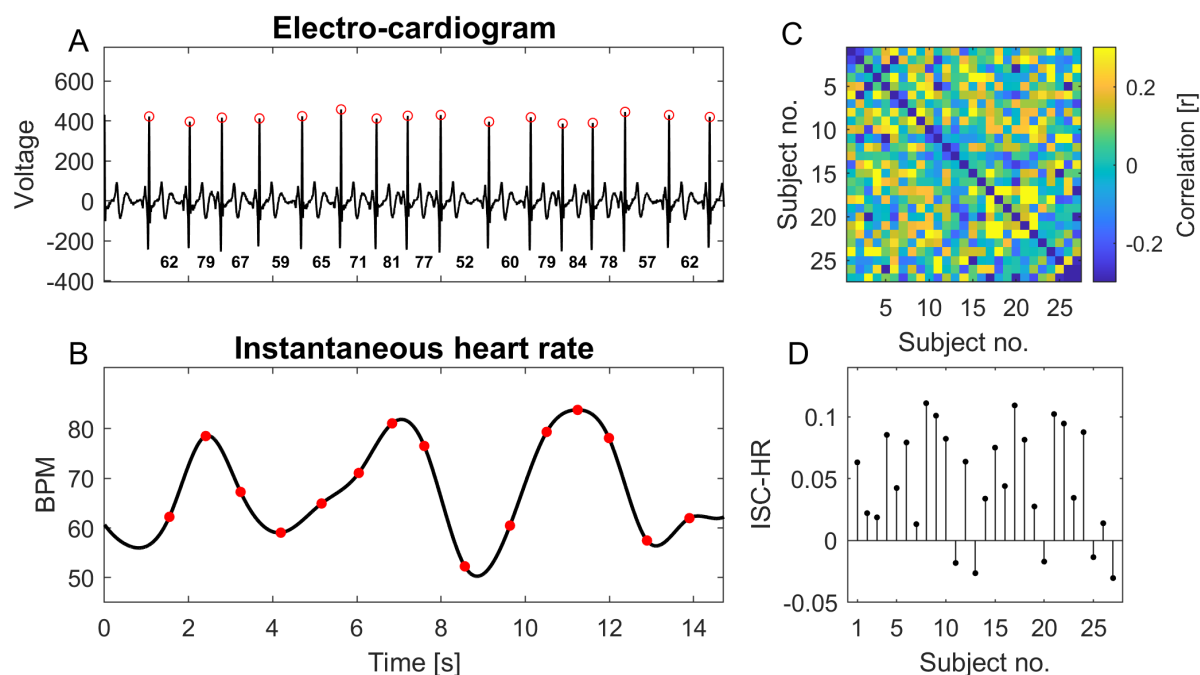

116

117 **Figure 1: Inter subject correlation of heart rate (ISC-HR),** **A:** Electro-cardiogram with peak of the R-  
118 wave detected (red o). **B:** The inverse of the interval between two R-waves defines the instantaneous  
119 heart rate (red o). This is interpolated (black) to convert heart rate into a signal with a uniform sampling  
120 rate across subjects. **C:** Pearson's correlation coefficient of this instantaneous heart rate between  
121 pairs of subjects. **D:** Inter-subject correlation of heart rate (ISC-HR) is computed for each individual as  
122 the mean across a row of this correlation matrix. Example in this figure is taken from history segment  
123 #1, dataset #1.

## 124 Auditory narratives synchronize listeners' heart rate fluctuations

125 The objective of the first experiment was to determine whether a common auditory narrative  
126 elicits similar heart rate fluctuations in healthy volunteers (Experiment 1). Subjects were  
127 presented with one-minute segments of an audiobook of Jules Verne's "20,000 leagues under  
128 the sea". First we tested whether there was significant inter-subject correlation of the  
129 instantaneous HR. To this end we compared the ISC-HR values to values computed on signals  
130 randomly shifted in time within-subjects (see methods). When this analysis is performed on  
131 individual one-minute segments, only a few subjects show significant non-zero ISC-HR (Fig.  
132 2A, red dots, FDR at 0.05). When averaging ISC-HR values over the 16 minutes, 17 of the 27  
133 subjects show statistically significant HR correlation (Fig. 2B; FDR at 0.05). No significant  
134 negative correlations were found. As an additional control, we randomly shuffle the one-minute  
135 story segments between subjects breaking the narrative synchrony across subjects. As  
136 expected, we observed a drop in ISC with values no longer statistically significant (Fig. 2C). In  
137 total, we conclude that the narrative stimulus induces similar HR fluctuations across subjects.  
138 ISC-HR therefore captures how strongly the stimulus drives the fluctuations of HR in each  
139 subject.

140 Results on average HR and HRV and their potential relation to ISC-HR are generally  
141 unremarkable for these data and are discussed in the Supplement (Fig. S1).

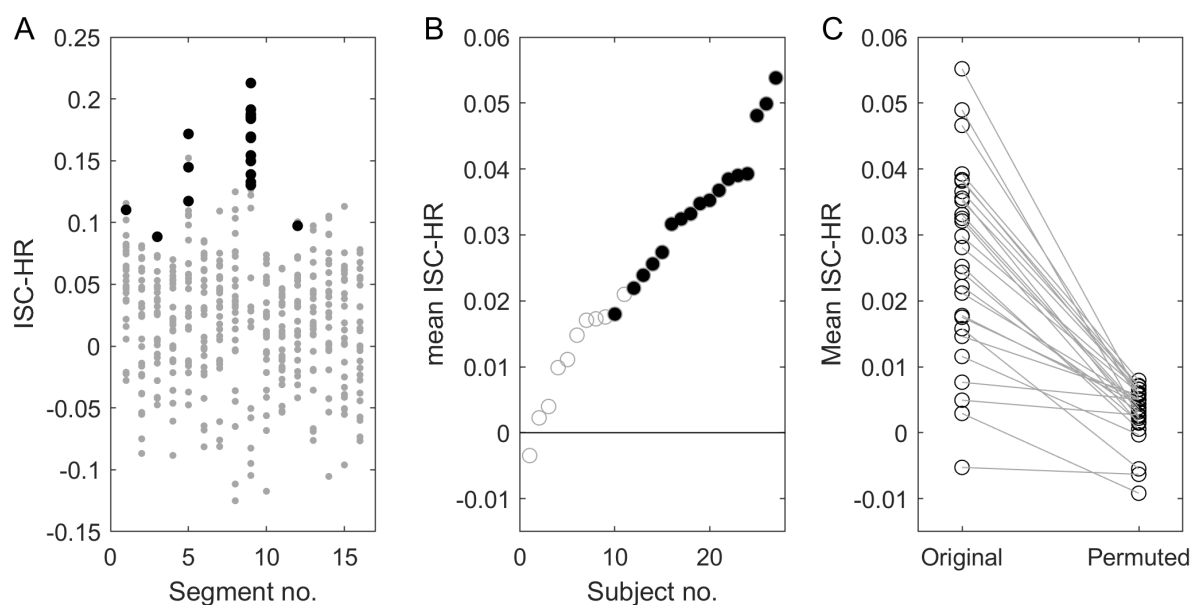

142

143 **Figure 2: ISC-HR resolved in time and by subject.** In Experiment 1, subjects listened to segments of  
144 audio narratives of 60 seconds each (N=16). **A:** ISC-HR is computed for each subject (N=27) and each  
145 segment. **B:** For each of the 27 subjects ISC is averaged over the 16 segments. Subjects are ordered  
146 by their ISC values. Black points (panel A and B) indicate statistically significant ISC values. Gray points  
147 are not statistically significant. Statistical significance is determined using circular shuffle statistics  
148 (10,000 shuffles and corrected for multiple comparisons with FDR of 0.01). Specifically, the heart rate  
149 signal of each subject is randomly shifted in time. **C:** As additional control here ISC is compared to the  
150 ISC obtained when story segments are swapped across subjects at random.

### 151 **Attention modulates synchronization of HR fluctuations during audiovisual narratives**

152 We demonstrated above that an auditory narrative can synchronize HR fluctuations across  
153 subjects. In the second experiment we aim to determine if this synchronization is modulated  
154 by attention to the stimulus (Experiment 2). Here we used short and engaging instructional  
155 videos of 3-5 minute duration, similar to our previous work<sup>27</sup>. Each subject viewed 5 videos in  
156 sequence normally. Then they view the same videos a second time, but now with the instruction  
157 to count backward silently in their mind in step 7 starting from a random number. This  
158 secondary task aims to distract subjects from viewing the video<sup>26,27</sup>.

159 We find that ISC-HR drops in the distracted condition relative to the normal attentive state (Fig.  
160 3A). A repeated-measures ANOVA shows a strong effect of attention ( $F(1,238)=73.45$ ,  
161  $p=1.32e-15$ ) and an effect of the video ( $F(4,238)=14.59$ ,  $p=1.14e-10$ ) as well as a subject effect  
162 ( $F(26,238)=2.86$ ,  $p=1.34e-05$ ). The effect of attention is significant for each story individually  
163 (follow up pairwise t-test, all  $p<0.05$ ) and when averaging over all 5 videos with a total duration  
164 of 22:33 minutes we see a numerical drop in ISC-HR with distraction in all but one of the 27  
165 subjects (Fig. 3B).

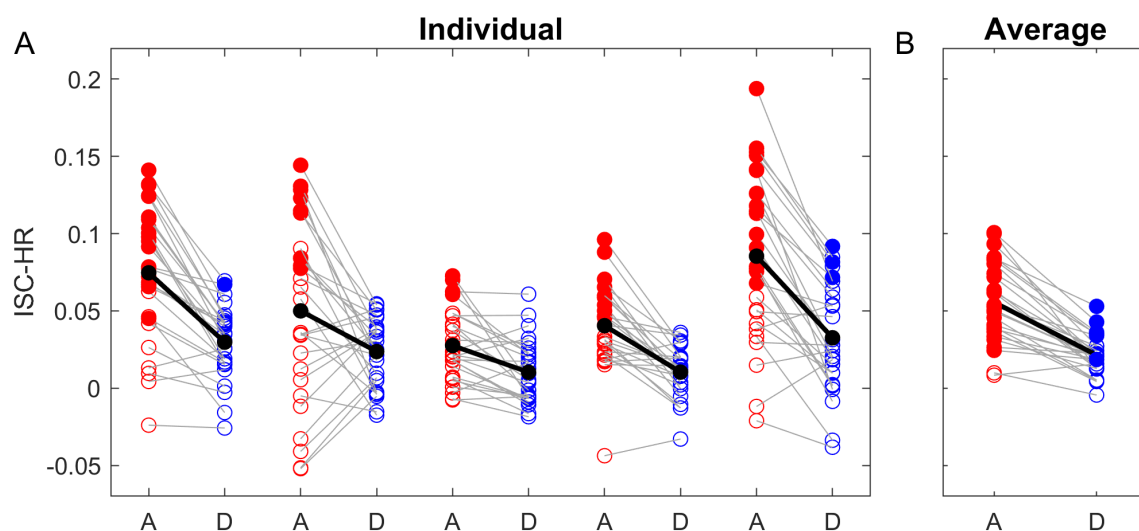

166

167 **Figure 3: Intersubject correlation (ISC) of the instantaneous heart rate is modulated by attention.**

168 In Experiment 2, 27 subjects watched 5 educational videos of 3-5 minute duration each. Here ISC is  
169 measured against the attentive condition, i.e. both attentive and distracted subjects are correlated  
170 against the HR collected during the attentive condition. Filled points indicate individually statistically  
171 significant ISC-HR (FDR < 0.01). **A:** Subjects watched the same videos twice, either in an attentive (A,  
172 red) or distracted (D, blue) condition. ISC was systematically higher in the attentive condition for the five  
173 videos. Gray lines indicate individual subjects and the black lines the group average. **B:** Same results  
174 when average across the five videos.

175

176 **Attention modulates HRV, but this is not the driving factor in modulation of ISC**

177

178 For this Experiment 2, in addition to ISC we also analyzed heart rate variability (HRV), defined  
179 here as the standard deviation of instantaneous HR (Fig. S2B). We see an increase in HRV  
180 when subjects are distracted. An ANOVA shows a fixed effect of attention ( $F(1,211)=63.60$ ,  
181  $p=9.54e-14$ ), random effect of subject ( $F(23,211)=29.56$ ,  $p=1.57e-53$ ), but we see no  
182 significant video effect ( $F(4,211)=0.77$ ,  $p=5.44e-01$ ). Perhaps the increase in HRV in the  
183 distracted condition could explain the drop in ISC-HR. If this was the case, we would expect  
184 that HRV correlates negatively with ISC-HR as, by definition, the two are inversely related.  
185 However, the opposite seems to be the case: subjects with higher HRV have also higher ISC-  
186 HR (Fig. S2D). Therefore, it appears that the modulation of HRV and ISC-HR are independent  
187 phenomena. The effects on mean HR were generally unremarkable (Fig. S2A & S2C).

188

189 **Synchronization of HR fluctuations is modulated in the time scale of 5-10 seconds**

190 It is well established that HR fluctuates at different timescales<sup>44</sup>. This is confirmed on the  
191 present data (of Experiment 2) by computing HRV after band-pass filtering the instantaneous  
192 HR in different frequency bands (Fig. 4A). To determine which time scale dominates ISC and  
193 its modulation with attention we computed ISC similarly resolved by frequency band (Fig. 4B).  
194 We find that ISC and its modulation with attention are dominant in the mid-frequency range --  
195 from 0.1 Hz to 0.2 Hz in this study -- a range of HR fluctuations that are known to disappear  
196 during slow-wave sleep<sup>45</sup>.

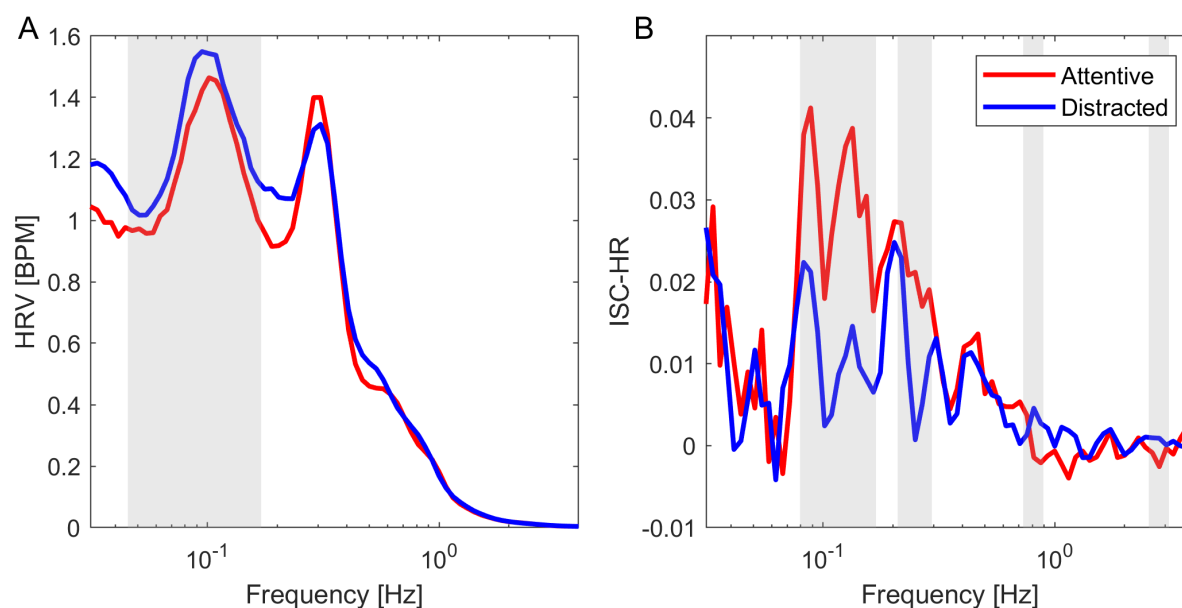

197  
198 **Figure 4. Spectrum of instantaneous HR and ISC-HR and its modulation with attention.** For  
199 Experiment 2, instantaneous HR was band-pass filtered with center frequency on a logarithmic scale  
200 and a bandwidth of 0.2 of the center frequency. **A:** HRV is computed here as the root mean square of  
201 the band-passed instantaneous HR averaged over the 5 videos (~15 min total). **B:** ISC-HR is computed  
202 as before, but now on the band-passed instantaneous HR and averaged over the 5 videos. In both  
203 panels significant differences between attending and distracted conditions are established in each band  
204 with a paired t-test over the 27 subjects (grey shaded area indicates  $p < 0.05$ , uncorrected).  
205

#### 206 **Attention modulates synchronization of HR fluctuations during audio-only narratives,** 207 **but does not synchronize breathing**

208 Given the dependence of HR fluctuations on attention, we expected that HR would be  
209 predictive of cognitive processing of the narrative. In the next experiment (Experiment 3) we,  
210 therefore, recorded HR during the presentation of auditory narratives, and afterward asked  
211 adult subjects to recall factual information presented in the story, e.g. “What was the name of  
212 the two main characters?”. Subjects listened to four auditory narratives, in either an attentive  
213 or distracted condition. This time the narratives were children’s stories of 8-11 minute duration,  
214 and the secondary task consisted of counting target tones that were inserted in the audio  
215 asynchronously across subjects. To rule out order effects we now divided the participants in  
216 two groups. In group 1 (N=9) subjects listened to stories 1 and 2 in the attentive condition and  
217 stories 3 and 4 in the distracted condition. In group 2 (n=12) subject listened to the same stories  
218 with the attention condition reversed.

219 We find again that ISC-HR drops significantly when subjects are distracted (Fig. 5A, paired t-  
220 test  $t(21)=8.2$ ,  $p < 10^{-7}$ ). Similarly to experiment 2 with video, here 15 out of the 21 subjects  
221 show a statistically significant correlation of HR in the attentive condition and none in the  
222 distracted condition. As expected, subjects performed significantly better in recalling elements  
223 of the story in the attentive condition as compared to the distracted condition (Supplementary  
224 Fig. S3, Wilcoxon Signed-Rank Test,  $z = 4.03$ ,  $p = 5.7e-5$ ).

225 Our hypothesis postulates that ISC-HR is the result of similar conscious processing of the  
226 narrative stimulus, thus, we predicted that subjects with higher ISC-HR will be better at

227 remembering elements of the stories. Indeed, we find that ISC correlates with memory recall  
228 performance across conditions (Fig 5B,  $r(40)=0.767$ ,  $p=3.1e-9$ , Spearman's correlation is used  
229 here due to the bounded nature of the percent measure). More importantly, even within the  
230 normally attentive condition with a normal fluctuation of HR we find that ISC-HR is predictive  
231 of memory performance ( $r(19)=0.57$ ,  $p=7.3 e-3$ ). In the distracted conditions there was no  
232 correlation with memory performance ( $r(19)=-0.1$ ,  $p=0.67$ ) possibly because ISC-HR was not  
233 statistically significant for any of the subjects. Overall we conclude that ISC-HR is indicative of  
234 conscious processing of the narrative.

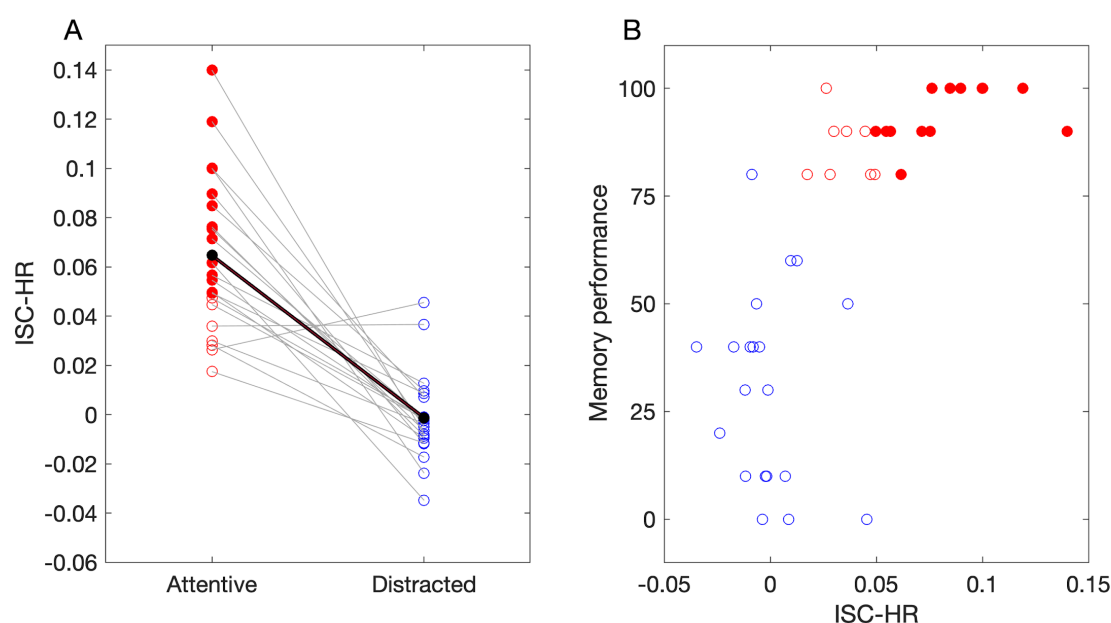

235

236 **Figure 5: Intersubject correlation is higher when subjects were attentive to the auditory narrative**  
237 **and this correlation indexes the subjects' memory performance.** In Experiment 3, Subjects listened  
238 to four recordings of children's stories 8-10 minutes in duration. Subjects were instructed to either attend  
239 to a story normally (attentive, red), or to count backward when they heard a target sound inserted in the  
240 audio (distracted, blue). Again ISC is measured against the attentive condition, i.e. both attentive and  
241 distracted subjects are correlated against the HR collected during the attentive condition. Filled points  
242 indicate individually statistically significant ISC-HR (FDR < 0.01). **A:** ISC-HR for each subject (N=21)  
243 averaged over four stories. **B:** Memory performance measured as percent of correct answers to free  
244 recall questions about the content of the stories. Filled and empty circles indicate significant and non-  
245 significant ISC-HR respectively ( $p < 0.05$  shuffle statistics)  
246

## 247 Intersubject correlation of heart rate is not driven by synchronous breathing

248 It is well established that HR fluctuations are driven in part by breathing. This phenomenon is  
249 known as respiratory sinus arrhythmia and is strongest in the frequency band around 0.1 Hz.<sup>46</sup>  
250 It is possible that the attentional modulation in this frequency band is caused by  
251 synchronization of breathing between subjects. We, therefore, collected in Experiment 3 also  
252 respiratory movement concurrently with the EKG and measured inter-subject correlation of  
253 breathing (Supplementary Fig. S5A). We did not find a significant ISC of breathing in any of  
254 the subjects, nor was there any effect of attention when comparing across all subjects (paired  
255 t-test,  $t(21)=0.5$ ,  $p=0.6$ ). In other words, the auditory narratives did not reliably entrain the  
256 subjects breathing nor was this modulated by attention. Interestingly, breathing does



257 significantly correlate with HR (Supplementary Figure S5B,  $t(20)=4.49$ ,  $p=2e-4$ ) reflecting the  
258 well-established respiratory sinus arrhythmia. In addition, we found a reduction breathing-HR  
259 correlation in the distracted condition versus the attentive condition but it didn't reach statistical  
260 significance ( $t(20)=1.86$ ,  $p=0.08$ ), suggesting that this link does not depend on attention. In  
261 conclusion, these results suggest that the effect of cognition on instantaneous HR is not related  
262 to breathing.

### 263 **Synchronization of heart rate fluctuations is disrupted in patients with disorder of** 264 **consciousness**

265 Given the dependence on attention and conscious processing of these synchronized HR  
266 fluctuations, we predicted that patients with disorders of consciousness (DOC) will have  
267 diminished HR synchronization when presented with an auditory narrative. We recorded EKG  
268 in 19 DOC patients, in addition to 24 healthy controls (Experiment 4). The patients were  
269 hospitalized to determine their state of consciousness and neurological prognosis. Patients  
270 were behaviorally assessed using the standard Coma Recovery Scale-revised<sup>47</sup>. State of  
271 consciousness was determined using the currently accepted categorization<sup>48</sup>, patients were  
272 classified either in (1) Coma, (2) Vegetative state/Unresponsive wakefulness syndrome  
273 (UWS), (3) Minimally conscious state minus (MCS-), (4) Minimally conscious state plus  
274 (MCS+), and exit Minimally conscious state (EMCS). Patients and healthy subjects listened  
275 through headphones to a children's story of 10-minute duration. ISC-HR was calculated by  
276 correlating HR with that of healthy controls. As expected ISC-HR values were lower in patients  
277 ( $t$ -test:  $t(41) = 3.14$ ,  $p = 0.003$ , Fig. 6A). Within patients no significant correlation was found  
278 between ISC-HR and state-of-consciousness (Fig. 6A, Spearman correlation,  $R(17) = -0.28$ ,  $p$   
279  $= 0.24$ ) nor between ISC-HR and the Coma Recovery Scale-Revised (CRS-R<sup>47</sup>; Fig 6B,  
280 Spearman correlation,  $R(17) = -0.3$ ,  $p = 0.22$ ). Reduced HRV is sometimes found in traumatic  
281 brain injury patients.<sup>49</sup> We therefore analyzed HRV to verify that the drop in ISC-HR is not a  
282 noise-floor effect, i.e. if HRV drops in patients it may be difficult to measure inter-subject  
283 correlation above random fluctuations (Fig. S6B). Contrary to what was expected we found  
284 higher HRV in the DOC patients compared to healthy controls ( $t(41) = 2.34$ ,  $p = 0.02$ ), ruling  
285 out a noise-floor effect. We also found higher mean HR in DOC patients compared to healthy  
286 controls (Fig S6A;  $t(41) = 4.7$ ,  $p = 2.9e-05$ ). However, given the previous lack of correlation  
287 between ISC and mean HR we do not believe this contributed to the decrease of ISC-HR in  
288 patients.

289 When measured individually, only two of 19 patients showed statistically significant ISC-HR  
290 (FDR corrected  $p < 0.05$ , Fig. 6, purple filled circles). For these two patients outcomes at the  
291 six-month follow-up were mixed; one patient fully regained consciousness whereas for the  
292 other, life-sustaining therapies were withdrawn before the follow-up assessment. Among the  
293 remaining 17 patients only one additional patient recovered consciousness, although in a  
294 completely aphasic condition. These results suggest that the patients' ISC-HR might carry  
295 prognostic information with a specific emphasis on conscious verbal processing. To test this  
296 hypothesis we first correlated the patients' ISC-HR to the CRS-R improvement after six months  
297 of the initial assessment. We found a positive correlation between ISC-HR and CRS-R  
298 improvement, although not statistically significant (Fig 6C, Spearman correlation,  
299  $R(14)=0.43$ ,  $p=0.097$ , second assessment was available only for 16 patients). A limitation of  
300 behavioral assessment of patients is that it cannot detect covert awareness<sup>50,51</sup>, a condition  
301 that can occur in up to 15% of the UWS patients<sup>52</sup>. Therefore, we also correlated the patients'

302 ISC-HR to an anatomical measure of brain integrity -- whole-brain white matter fractional  
303 anisotropy. This FA index has been linked to neurological recovery in DOC patients<sup>53</sup>. We  
304 found a significant correlation between ISC-HR and FA Index (Fig. 6D, Spearman correlation,  
305  $R(9)=0.73, p=0.01$ , FA Index was available only for 11 patients).

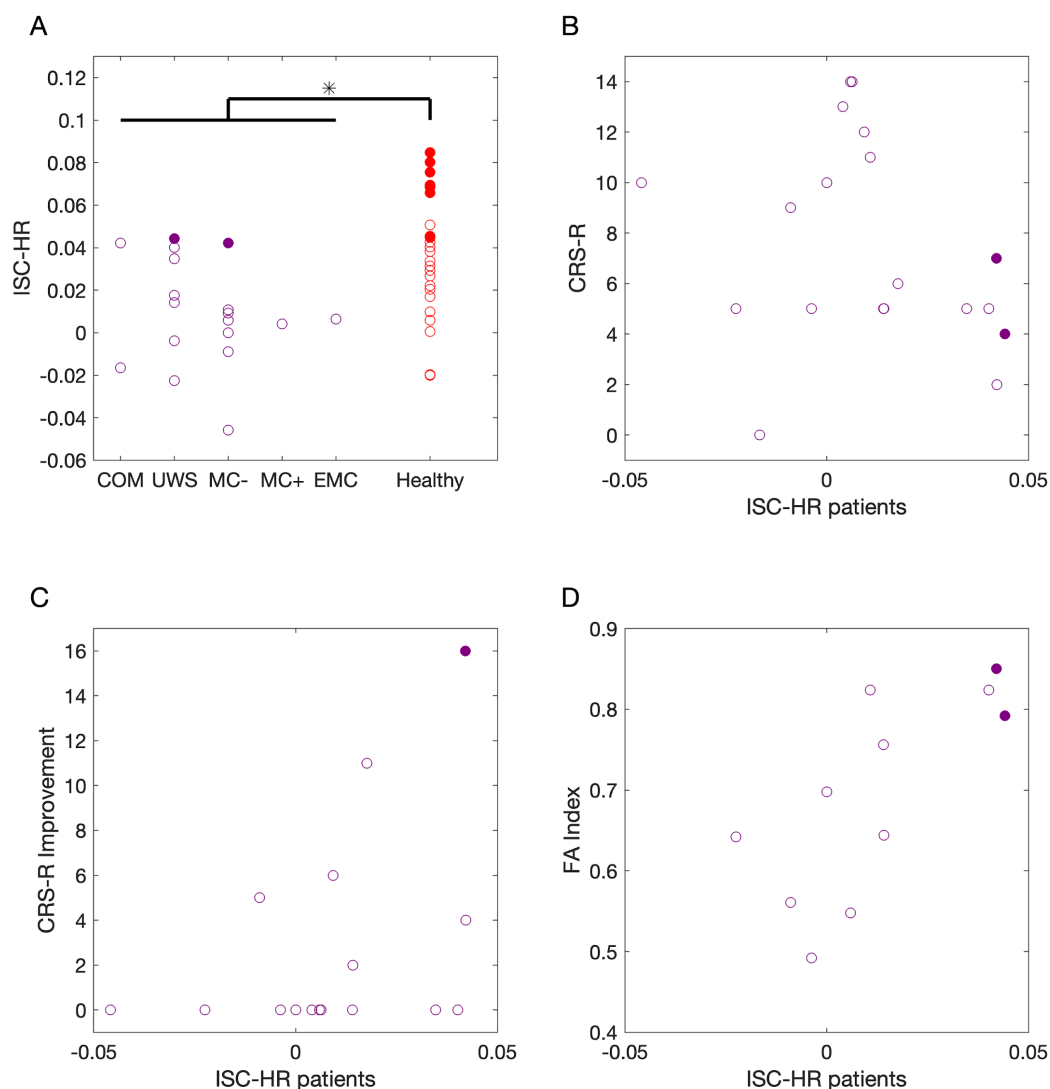

306

307 **Figure 6: Audio narratives synchronize HR fluctuations in healthy controls but not in**  
308 **patients with disorder of consciousness.** In Experiment 4, subjects listened to a children's  
309 story (La part des ancêtres from Leonora Miano; 10 minutes). **A:** ISC-HR is measured by  
310 correlating instantaneous HR with that of healthy subjects. Filled cycles indicated statistically  
311 significant ISC. **B:** Comparison of the ISC-HR with Coma Recovery Scale-Revised in patients  
312 (N=19). **C:** Comparison of the ISC-HR with improvement of Coma Recovery Scale-Revised six  
313 months after the first assessment (N=17) **D:** Comparison of ISC-HR and whole-brain white  
314 matter fractional anisotropy in patients, were available (N=11).

## 315 Discussion

316 The hypothesis that motivated this set of experiments was that conscious processing of  
317 information modulates instantaneous heart rate. This fluctuating heart rate will synchronize

318 across subjects when presented with narrative stimuli that are processed similarly. We tested  
319 the predictions resulting from this hypothesis in a series of four experiments. In the first  
320 experiment with healthy volunteers we confirmed that heart rate fluctuations correlate between  
321 subjects for auditory narratives. In the second and third experiment we confirm that distracting  
322 the participants with a secondary task reduced this correlation, for video and audio narratives  
323 alike. Importantly, we confirm the prediction that synchronization of HR fluctuations is predictive  
324 of memory performance. We also determined that HR synchronization is not driven by  
325 synchronous breathing across subjects. Finally, in the fourth experiment we presented an  
326 auditory narrative to patients with disorders of consciousness and found that their heart rate  
327 fluctuations do not correlate with that of healthy subjects.

328  
329 There is an extensive literature demonstrating that physiological signals such as heart rate,  
330 respiration, and skin conductivity can synchronize between individuals.<sup>36</sup> This literature  
331 emphasizes physical interaction and social relationships as the factors driving this  
332 synchronization. Even in the context of music, theater, or film, the emphasis is on the  
333 concurrent and shared experience of an audience that synchronizes heart rate to one-  
334 another.<sup>37–39,54</sup> Here we have emphasized instead that it is the stimulus that synchronizes HR,  
335 or more precisely, a similar processing of a common stimulus. There is no need for individuals  
336 to directly interact, be related to one another or perceive the stimulus together at the same  
337 time. Consistent with our hypothesis, previous reports already show that emotional movies  
338 can synchronize the HR of viewers, even when watching the movie individually.<sup>42,43</sup> The  
339 present findings go beyond this previous literature in that this HR synchronization  
340 phenomenon is not specific to live experiences or emotional movies. Rather, it occurs with  
341 many narrative stimuli, as we demonstrated here with audio recordings of children’s stories or  
342 animated educational videos.

343  
344 There is also an extensive literature on the inter-subject correlation of brain signals evoked by  
345 dynamic natural stimuli, starting with experiments in fMRI while subjects watched movies.<sup>19</sup>  
346 This work demonstrated that subjects process natural stimuli similarly, and that similarity of  
347 brain activity is predictive of memory performance.<sup>55</sup> Subsequent experiments replicated these  
348 findings with EEG.<sup>56,57</sup> Additionally, ISC of EEG is reduced when subjects are distracted<sup>26</sup> and  
349 is reduced in patients with disorder of consciousness,<sup>58</sup> similar to what we find here with the  
350 instantaneous heart rate. Given these parallels we expect that HR fluctuations will also  
351 synchronize across subjects listening to engaging music,<sup>21</sup> and that HR synchronization will  
352 be a good indication of how engaging a narrative is.<sup>32,59</sup>

353  
354 We suggest that some previous work on physiological synchronization of autonomic signals  
355 can be reinterpreted in the context of the present conscious processing hypothesis. For  
356 example, the same performance is judged differently depending on the social relationship of  
357 performer and audience member, suggesting that it is a different way of processing information  
358 in the audience member.<sup>37</sup> In our view, it is the processing of the common stimulus, and not  
359 the co-presence in the same physical space that causes the synchronization of the heart rate  
360 fluctuations. We predict that many results obtained with live performances<sup>37–39</sup> or in-person  
361 interactions<sup>26</sup> could be recovered with asynchronous playback of the same experience  
362 recorded with video. Evidently the experience may be less powerful than live in-person  
363 experiences,<sup>41</sup> but the modulating factors of relationships, emotions, or empathy may still  
364 prevail in this virtual context.

365

366 We postulate that factors intrinsic to the story, such as semantics and emotions, driving a  
367 synchronized heart rate. This may include semantics of single-word to syntactic and multi-  
368 sentence level of representation as well as prosody, valence of single words, and more  
369 complex semantically mediated emotions. Capturing semantics and emotions require  
370 attention to the stimulus and some level of language comprehension. In this view, it is the  
371 narrative content that drives attention, engagement, interest and emotions. It is possible,  
372 indeed likely that the variations in ISC are due to this differing narrative content. Indeed we  
373 find a strong difference in ISC between stimuli, even within the same type of animated  
374 educational videos. Dependence of ISC on the stimulus has been found in previous EEG  
375 studies<sup>32,35,60</sup> and for heart rate in studies involving live performance for different pieces of  
376 classical music.<sup>39</sup> In contrast to EEG, we may expect that ISC-HR is less sensitive to low-  
377 level features of a stimulus. Neural evoked responses can be driven by low-level features such  
378 as luminance or sound fluctuations, which can elicit strong responses that would be trivially  
379 synchronized across subjects.<sup>19,61</sup> To us it is less clear how such low-level stimulus fluctuations  
380 could drive HR fluctuations.

381 We have shown here that the effect on HR synchronization is dominant in the frequency band  
382 around 0.1Hz, which falls in the frequency range of respiratory sinus arrhythmia.<sup>46</sup> However,  
383 we show here that breathing does not synchronize between subjects, nor is the link between  
384 breathing and instantaneous heart rate dependent on attention. Given the link between  
385 respiratory sinus arrhythmia and parasympathetic cardiac control,<sup>62</sup> this result suggests that  
386 attention does not affect parasympathetic activity.

387 Finally, we made a proof-of-concept that the ISC-HR could be used as a simple marker for  
388 cognitive state in unresponsive patients. Note that this is in line with previous work on ISC of  
389 EEG<sup>28</sup>, fMRI<sup>30</sup>, and similar findings with galvanic skin response<sup>63</sup>. While we were able to  
390 distinguish patients from healthy controls, we were not able to resolve conscious states among  
391 patients. However, the results do suggest that the ISC-HR might carry information related to  
392 the patients' recovery. Note that the proposed method requires the patients to be conscious,  
393 but also to be able to process language. This double requirement may explain the positive test  
394 in one patient who recovered with preserved language processing, and a negative test in a  
395 patient who recovered in an aphasic condition. In addition, we believe that the 10 minutes story  
396 we used may have been too short for a reliable measure of ISC-HR. In the present experiments  
397 we required at least 15 minutes of instantaneous heart rate to detect significant ISC, and a link  
398 to memory. We suggest that future studies on clinical utility use one or several narratives  
399 totaling at least 30 minutes of concurrent heart rate recordings. In addition, our results also  
400 indicate that the actual content of the story, and how engaging it is for the subject, plays a role  
401 in the individual ISC. Given the limited cognitive status of the patients it is critical to maximize  
402 this factor. We also suggest that the narratives should be adapted for every single patient, for  
403 instance by changing the name of the leading character using the patients' own name. By doing  
404 so we will amplify the patients' attention while keeping the overall structure of the story  
405 comparable across subjects.

406

## 407 Bibliography

- 408 1. Levy, M. N. & Martin, P. J. Autonomic Neural Control of Cardiac Function. in *Physiology*  
409 *and Pathophysiology of the Heart* (ed. Sperelakis, N.) 361–379 (Springer US, 1989).  
410 doi:10.1007/978-1-4613-0873-7\_17.
- 411 2. Palma, J.-A. & Benarroch, E. E. Neural control of the heart: recent concepts and clinical  
412 correlations. *Neurology* **83**, 261–271 (2014).
- 413 3. Cooke, W. H. *et al.* Controlled breathing protocols probe human autonomic  
414 cardiovascular rhythms. *Am. J. Physiol.* **274**, H709-718 (1998).
- 415 4. Bernardi, L., Valle, F., Coco, M., Calciati, A. & Sleight, P. Physical activity influences  
416 heart rate variability and very-low-frequency components in Holter electrocardiograms.  
417 *Cardiovasc. Res.* **32**, 234–237 (1996).
- 418 5. Kyeong, S., Kim, J., Kim, D. J., Kim, H. E. & Kim, J.-J. Effects of gratitude meditation on  
419 neural network functional connectivity and brain-heart coupling. *Sci. Rep.* **7**, 5058  
420 (2017).
- 421 6. Park, H.-D., Correia, S., Ducorps, A. & Tallon-Baudry, C. Spontaneous fluctuations in  
422 neural responses to heartbeats predict visual detection. *Nat. Neurosci.* **17**, 612–8  
423 (2014).
- 424 7. Park, H.-D. & Tallon-Baudry, C. The neural subjective frame: from bodily signals to  
425 perceptual consciousness. *Philos. Trans. R. Soc. Lond. B. Biol. Sci.* **369**, 20130208  
426 (2014).
- 427 8. Ekman, P., Levenson, R. W. & Friesen, W. V. Autonomic nervous system activity  
428 distinguishes among emotions. *Science* **221**, 1208–1210 (1983).
- 429 9. McCorry, L. K. Physiology of the Autonomic Nervous System. *Am. J. Pharm. Educ.* **71**,  
430 (2007).
- 431 10. Dehaene, S. & Changeux, J.-P. J. P. Experimental and theoretical approaches to  
432 conscious processing. *Neuron* **70**, 200–227 (2011).
- 433 11. Morlet, D. & Fischer, C. MMN and Novelty P3 in Coma and Other Altered States of

- 434        Consciousness: A Review. *Brain Topogr.* (2013) doi:10.1007/s10548-013-0335-5.
- 435    12. Bekinschtein, T. A. *et al.* Neural signature of the conscious processing of auditory  
436        regularities. *Proc. Natl. Acad. Sci. U. S. A.* **106**, 1672–7 (2009).
- 437    13. Schlossmacher, I., Dellert, T., Pitts, M., Bruchmann, M. & Straube, T. Differential Effects  
438        of Awareness and Task Relevance on Early and Late ERPs in a No-Report Visual  
439        Oddball Paradigm. *J. Neurosci.* **40**, 2906–2913 (2020).
- 440    14. Cruse, D. *et al.* The reliability of the N400 in single subjects: Implications for patients  
441        with disorders of consciousness. *NeuroImage Clin.* **4**, 788–799 (2014).
- 442    15. Rohaut, B. *et al.* Probing ERP correlates of verbal semantic processing in patients with  
443        impaired consciousness. *Neuropsychologia* **66**, 279–292 (2015).
- 444    16. Raimondo, F. *et al.* Brain-heart interactions reveal consciousness in noncommunicating  
445        patients. *Ann. Neurol.* **82**, 578–591 (2017).
- 446    17. Mack, A. & Rock, I. *Inattention blindness*. xiv, 273 (The MIT Press, 1998).
- 447    18. Trübutschek, D., Marti, S., Ueberschär, H. & Dehaene, S. Probing the limits of activity-  
448        silent non-conscious working memory. *Proc. Natl. Acad. Sci.* **116**, 14358–14367 (2019).
- 449    19. Hasson, U., Nir, Y., Levy, I., Fuhrmann, G. & Malach, R. Intersubject synchronization of  
450        cortical activity during natural vision. *Science* **303**, 1634–1640 (2004).
- 451    20. Pérez, A., Carreiras, M. & Duñabeitia, J. A. Brain-to-brain entrainment: EEG interbrain  
452        synchronization while speaking and listening. *Sci. Rep.* **7**, 4190 (2017).
- 453    21. Madsen, J., Margulis, E. H., Simchy-Gross, R. & Parra, L. C. Music synchronizes  
454        brainwaves across listeners with strong effects of repetition, familiarity and training. *Sci.*  
455        *Rep.* **9**, 3576 (2019).
- 456    22. Bernardi, G. *et al.* It's not all in your car: functional and structural correlates of  
457        exceptional driving skills in professional racers. *Front. Hum. Neurosci.* **8**, (2014).
- 458    23. Chen, J. *et al.* Shared memories reveal shared structure in neural activity across  
459        individuals. *Nat. Neurosci.* **20**, 115–125 (2017).
- 460    24. Zhang, J. R., Sherwin, J., Dmochowski, J., Sajda, P. & Kender, J. R. Correlating  
461        Speaker Gestures in Political Debates with Audience Engagement Measured via EEG.

- 462 in *Proceedings of the 22nd ACM international conference on Multimedia* 387–396  
463 (Association for Computing Machinery, 2014). doi:10.1145/2647868.2654909.
- 464 25. Hasson, U., Chen, J. & Honey, C. J. Hierarchical process memory: memory as an  
465 integral component of information processing. *Trends Cogn. Sci.* **19**, 304–313 (2015).
- 466 26. Ki, J. J., Kelly, S. P. & Parra, L. C. Attention Strongly Modulates Reliability of Neural  
467 Responses to Naturalistic Narrative Stimuli. *J. Neurosci.* **36**, 3092–3101 (2016).
- 468 27. Cohen, S. S. *et al.* Neural engagement with online educational videos predicts learning  
469 performance for individual students. *Neurobiol. Learn. Mem.* **155**, 60–64 (2018).
- 470 28. Iotzov, I. *et al.* Divergent neural responses to narrative speech in disorders of  
471 consciousness. *Ann. Clin. Transl. Neurol.* **4**, 784–792 (2017).
- 472 29. Naci, L., Graham, M., Owen, A. M. & Weijer, C. Covert narrative capacity: Mental life in  
473 patients thought to lack consciousness. *Ann. Clin. Transl. Neurol.* **4**, 61–70 (2017).
- 474 30. Naci, L., Cusack, R., Anello, M. & Owen, A. M. A common neural code for similar  
475 conscious experiences in different individuals. *Proc. Natl. Acad. Sci.* 1407007111-  
476 (2014) doi:10.1073/pnas.1407007111.
- 477 31. Honey, C. J. *et al.* Slow Cortical Dynamics and the Accumulation of Information over  
478 Long Timescales. *Neuron* **76**, 423–434 (2012).
- 479 32. Dmochowski, J. P. *et al.* Audience preferences are predicted by temporal reliability of  
480 neural processing. *Nat. Commun.* **5**, 4567 (2014).
- 481 33. Schmälzle, R., Häcker, F., Renner, B., Honey, C. J. & Schupp, H. T. Neural Correlates of  
482 Risk Perception during Real-Life Risk Communication. *J. Neurosci.* **33**, 10340–10347  
483 (2013).
- 484 34. Schmälzle, R., Häcker, F. E. K., Honey, C. J. & Hasson, U. Engaged listeners: shared  
485 neural processing of powerful political speeches. *Soc. Cogn. Affect. Neurosci.* **10**, 1137–  
486 1143 (2015).
- 487 35. Cohen, S. S. *et al.* Neural engagement with online educational videos predicts learning  
488 performance for individual students. *Neurobiol. Learn. Mem.* **155**, 60–64 (2018).
- 489 36. Palumbo, R. V. *et al.* Interpersonal Autonomic Physiology: A Systematic Review of the

- 490 Literature. *Personal. Soc. Psychol. Rev.* **21**, 99–141 (2017).
- 491 37. Konvalinka, I. *et al.* Synchronized arousal between performers and related spectators in  
492 a fire-walking ritual. *Proc. Natl. Acad. Sci.* **108**, 8514–8519 (2011).
- 493 38. Ardizzi, M., Calbi, M., Tavaglione, S., Umiltà, M. A. & Gallese, V. Audience spontaneous  
494 entrainment during the collective enjoyment of live performances: physiological and  
495 behavioral measurements. *Sci. Rep.* **10**, 1–12 (2020).
- 496 39. Bernardi, N. F. *et al.* Increase in Synchronization of Autonomic Rhythms between  
497 Individuals When Listening to Music. *Front. Physiol.* **8**, (2017).
- 498 40. Gordon, I. *et al.* Physiological and Behavioral Synchrony Predict Group Cohesion and  
499 Performance. *Sci. Rep.* **10**, 8484 (2020).
- 500 41. Golland, Y., Arzouan, Y. & Levit-Binnun, N. The Mere Co-Presence: Synchronization of  
501 Autonomic Signals and Emotional Responses across Co-Present Individuals Not  
502 Engaged in Direct Interaction. *PLoS ONE* **10**, (2015).
- 503 42. Golland, Y., Keissar, K. & Levit-Binnun, N. Studying the dynamics of autonomic activity  
504 during emotional experience. *Psychophysiology* **51**, 1101–1111 (2014).
- 505 43. Steiger, B. K., Kegel, L. C., Spirig, E. & Jokeit, H. Dynamics and diversity of heart rate  
506 responses to a disaster motion picture. *Int. J. Psychophysiol.* **143**, 64–79 (2019).
- 507 44. Akselrod, S. *et al.* Power spectrum analysis of heart rate fluctuation: a quantitative probe  
508 of beat-to-beat cardiovascular control. *Science* **213**, 220–222 (1981).
- 509 45. Baharav, A. *et al.* Fluctuations in autonomic nervous activity during sleep displayed by  
510 power spectrum analysis of heart rate variability. *Neurology* **45**, 1183–1187 (1995).
- 511 46. Angelone, A. & Coulter, N. A. Respiratory sinus arrhythmia: a frequency dependent  
512 phenomenon. *J. Appl. Physiol.* **19**, 479–482 (1964).
- 513 47. Giacino, J. T., Kalmar, K. & Whyte, J. The JFK Coma Recovery Scale-Revised:  
514 measurement characteristics and diagnostic utility. *Arch. Phys. Med. Rehabil.* **85**, 2020–  
515 2029 (2004).
- 516 48. Bruno, M.-A., Vanhaudenhuyse, A., Thibaut, A., Moonen, G. & Laureys, S. From  
517 unresponsive wakefulness to minimally conscious PLUS and functional locked-in



- 518 syndromes: recent advances in our understanding of disorders of consciousness. *J.*  
519 *Neurol.* **258**, 1373–1384 (2011).
- 520 49. Riganello, F., Dolce, G. & Sannita, W. G. Heart rate variability and the central autonomic  
521 network in the severe disorder of consciousness. *J. Rehabil. Med.* **44**, 495–501 (2012).
- 522 50. Owen, A. M. *et al.* Detecting awareness in the vegetative state. *Science* **313**, 1402  
523 (2006).
- 524 51. Schiff, N. D. Cognitive Motor Dissociation Following Severe Brain Injuries. *JAMA Neurol.*  
525 **72**, 1413–1415 (2015).
- 526 52. Kondziella, D., Friberg, C. K., Frokjaer, V. G., Fabricius, M. & Møller, K. Preserved  
527 consciousness in vegetative and minimal conscious states: systematic review and meta-  
528 analysis. *J. Neurol. Neurosurg. Psychiatry* **87**, 485–92 (2016).
- 529 53. Velly, L. *et al.* Use of brain diffusion tensor imaging for the prediction of long-term  
530 neurological outcomes in patients after cardiac arrest: a multicentre, international,  
531 prospective, observational, cohort study. *Lancet Neurol.* **17**, 317–326 (2018).
- 532 54. Kaltwasser, L. *et al.* Sharing the filmic experience - The physiology of socio-emotional  
533 processes in the cinema. *PLoS ONE* **14**, (2019).
- 534 55. Hasson, U., Furman, O., Clark, D., Dudai, Y. & Davachi, L. Enhanced Intersubject  
535 Correlations during Movie Viewing Correlate with Successful Episodic Encoding. *Neuron*  
536 **57**, 452–462 (2008).
- 537 56. Dmochowski, J. P. *et al.* Audience preferences are predicted by temporal reliability of  
538 neural processing. *Nat. Commun.* **5**, 4567 (2014).
- 539 57. Cohen, S. S. & Parra, L. C. Memorable Audiovisual Narratives Synchronize Sensory and  
540 Supramodal Neural Responses. *eNeuro* **3**, ENEURO.0203-16.2016 (2016).
- 541 58. Iotzov, I. *et al.* Divergent neural responses to narrative speech in disorders of  
542 consciousness. *Ann. Clin. Transl. Neurol.* **4**, 784–792 (2017).
- 543 59. Cohen, S. S., Henin, S. & Parra, L. C. Engaging narratives evoke similar neural activity  
544 and lead to similar time perception. *Sci. Rep.* **7**, 4578 (2017).
- 545 60. Madsen, J., Margulis, E. H., Simchy-Gross, R. & Parra, L. C. Music synchronizes

- 546 brainwaves across listeners with strong effects of repetition, familiarity and training. *Sci.*  
547 *Rep.* **9**, 1–8 (2019).
- 548 61. Poulsen, A. T., Kamronn, S., Dmochowski, J., Parra, L. C. & Hansen, L. K. EEG in the  
549 classroom: Synchronised neural recordings during video presentation. *Sci. Rep.* **7**,  
550 43916 (2017).
- 551 62. Katona, P. G. & Jih, F. Respiratory sinus arrhythmia: noninvasive measure of  
552 parasympathetic cardiac control. *J. Appl. Physiol.* **39**, 801–805 (1975).
- 553 63. Sinai, L. Naturalistic paradigms for neuroimaging and bedside measures of conscious  
554 awareness. *Electron. Thesis Diss. Repos.* (2015).
- 555 64. Jenkinson, M., Beckmann, C. F., Behrens, T. E. J., Woolrich, M. W. & Smith, S. M. FSL.  
556 *NeuroImage* **62**, 782–790 (2012).
- 557 65. Mori, S. *et al.* Stereotaxic white matter atlas based on diffusion tensor imaging in an  
558 ICBM template. *NeuroImage* **40**, 570–582 (2008).

559

560

## 561 Methods

### 562 Datasets

#### 563 *Experiment 1 : auditory narratives with healthy participants*

564 Twenty-seven native English speakers and healthy participants (22 females, age range 18-  
565 26, median 21 years old) listened to a 16-minute extract of an audiobook read by a male British  
566 English voice (20,000 leagues under the sea. Author: Jules Verne. Read by: David Linski.  
567 Public Domain (P) 2017 Blackstone Audio, Inc.) while their EKG was recorded. The audiobook  
568 extract was taken from the first chapter and half of the second chapter. The text is relatively  
569 suspenseful as it describes reports of an unknown monster that destroys ships. We divided  
570 the story into essays of approximately 1 minute each so that participants could take breaks  
571 between segments if they wished.

572 The instructions given to the subject were 'to listen to the story and look at a fixation cross'.  
573 The stimuli were delivered by headphones - ER-1 Insert Earphones (Etymotic Research),  
574 using Psychopy v3.1.2. The EKG was recorded with two electrodes on the chest using  
575 SenseBox of ANT Neuro, sampled at 500Hz.

576 EKG data was cut into the 16 epochs of approximately 1-minute corresponding to each audio-  
577 segment.

578 This study was approved by the STEM ethics committee of the University of Birmingham,  
579 England.

580

#### 581 *Experiment 2: instructional videos with healthy participants*

582 Thirty-one students watched 5 instructional videos while their EKG were recorded (19 females,  
583 age range 18-46, median 28 years old) in an attentive condition (A), where they were instructed  
584 to simply watch videos as they would regularly watch a video. Each educational video was 3-  
585 5 minutes long, chosen from popular YouTube channels covering biology, physics, and  
586 computer science. These are new recordings on videos we had tested previously.<sup>35</sup> After the  
587 students had watched all 5 videos, they were asked to answer 10-12 questions about factual  
588 information about material conveyed in each video. Lastly, students were instructed to watch  
589 the video again in a distracted condition (D). In this condition participants were asked to silently  
590 count in their mind backwards from a random prime number above 800 and below 1000, in  
591 steps of 7.

592

593 The experiment was carried out at the City College of New York in a sound-attenuated booth.  
594 Subject wore headphones and watched the videos on a 19" monitor. The EKG was recorded  
595 with a BioSemi Active Two system at a sampling frequency of 2048Hz. 2 EKG electrodes were  
596 placed below the left collar bone and one on the left lumbar region. For segmentation of the  
597 EKG signal onset and offset triggers were used, in addition a flash and beep sound was  
598 embedded right before and after each video which were recorded using a StimTracker  
599 (Cedrus) to ensure precise alignment across all subjects. Of the thirty-one participants 4 were  
600 removed from analysis due to bad signal quality resulting in usable data for N=27 participants.

601 The experimental protocol was approved by the Institutional Review Boards of the City  
602 University of New York. Documented informed consent was obtained from all subjects for  
603 laboratory experiments.

604

605 *Experiment 3: auditory narratives with healthy participants and respiration*

606 The EKG of 25 french native healthy participants (15 females; age range 22-28, median age  
607 25 years old) listened to four stories while their EKG and respiration was recorded using a  
608 Polygraph Input Box (PIB of EGI-Geodesic's physiological measurement system). This  
609 includes a chest belt to measure respiratory movement (Respiration Belt MR - Brain Products)  
610 and 2 EKG electrodes placed on the left subclavicular area and below the left axillary area. Of  
611 the twenty-five participants four were removed because of missing respiratory and/or cardiac  
612 data. The four audio stimuli come from <https://www.franceinter.fr/emissions/une-histoire-et-oli>  
613 : (1) Nadine et Robert les poissons rouges- Delphine de Vigan (8 min) (2) les villages du  
614 versant – Alice Zeniter (8 min) (3) Opaque et Opaline - Alex Vizorek (11 min) (4) le renard et  
615 le poulailler – Guillaume Meurice (10 min).

616 To test whether the ISC-HR is modulated by attention we divided the subjects into 2 groups:  
617 Group 1 (9 subjects) was recorded with stories (1) and (2) in a distracted condition, and (3)  
618 and (4) in an attentional condition. In group 2 (12 subjects) the stories were counterbalanced,  
619 stories (1) and (2) in the attentional condition, and (3) and (4) in the distracted condition. In the  
620 attentional condition (A), the subject's task was to pay attention to the story while disregarding  
621 tones (320/360/400/440/482 Hz, 400ms long) that were played in random intervals (between  
622 800ms and 1100ms) in the background of the story. After each story the subjects received a  
623 control debriefing questionnaire including 5 questions testing the memory performance of the  
624 story content. In the distracted condition (D), the subject's task was to count backwards starting  
625 from 100 indexing the occurrence of 'counting' tones (same tones as in the attentional  
626 condition) in-between 2 'reset' tones (Audacity- the type of tones is a linear decay between  
627 1300 and 400 Hz during 400ms). The reset tones were added uniformly and randomly every  
628 14 seconds on average. After each 'reset' tone, subjects had to reset the counting back to 100.  
629 At the end of the block the subjects had to report the smallest number obtained between 2  
630 'reset' tones. Subjects were instructed not to pay attention to the story and also receive the  
631 same debriefing questionnaire. The present research was promoted by the Inserm (CPP C13-  
632 41) and approved by the Comité de Protection des Personnes Ile-de-France 6. All subjects  
633 provided written informed consent.

634 *Experiment 4: Auditory narratives with disorder of consciousness patients and healthy controls*

635 Nineteen patients (8 females, age range 18 to 77, median age 50 years old) with disorders of  
636 consciousness (mostly resulting from brain lesions) and 24 healthy control subjects (14  
637 females; age range 23-27, median 25 years old) listened to an auditory narrative (La part des  
638 ancêtres - Leonora Miano - 10 minutes, from: [https://www.franceinter.fr/emissions/une-](https://www.franceinter.fr/emissions/une-histoire-et-oli)  
639 [histoire-et-oli](https://www.franceinter.fr/emissions/une-histoire-et-oli)) through headphones while their EKG was recorded with a Polygraph Input Box  
640 (PIB of EGI-Geodesic's physiological measurement system). The only instruction given to all  
641 subjects (healthy controls and patients) was to listen to the story. These patients were  
642 hospitalized in neurointensive care at Pitié Salpêtrière (medical center with expertise in  
643 disorder of consciousness) to determine their state of consciousness, to adapt treatment, and  
644 to evaluate their neurological prognosis. During this evaluation, we performed several exams:  
645 clinical assessment, MRI, EEG, evoked response potential, and positron emission  
646 tomography. The state of consciousness is determined with some<sup>61</sup> behavioral assessments,

647 using the Coma Recovery Scale-revised<sup>43</sup> - a score which allows differentiating between  
648 consciousness states: Coma (the patient does not open their eyes), Vegetative State (VS -  
649 Eye-opening, and alternance between wakefulness and sleep), Minimally Conscious State  
650 (MCS - the patient is able to follow their own face in the mirror or to follow a simple instruction)  
651 and Exit Minimally Conscious State (EMCS - patient can communicate with code). Among the  
652 19 patients, we diagnosed 2 patients in coma, 8 VS patients, 8 MCS patients (7 MCS- and 1  
653 MCS+) and 1 EMCS (see supplementary data for more details). The Ethical Committee of the  
654 Pitie-Salpetriere approved this research under the French label of 'routine care research'.

## 655 **Computation of intersubject correlation of heart rate (ISC-HR)**

656 Previous studies have relied on the quantification of synchrony of neuroimaging based time  
657 series (i.e. BOLD in fMRI<sup>25</sup> or signals from EEG electrodes<sup>27</sup>). We follow a similar logic for  
658 the electrocardiographic (EKG) signal. We focus on the modulation of heart rate, by doing so  
659 we can determine if subjects increase or decrease their heart rate simultaneously,  
660 independently of their absolute level of heart rate. Step 1: We measure the EKG signal and  
661 detrend it using a high-pass filter (0.5 Hz cutoff) and subsequently notch filtered at either 50Hz  
662 (Experiment 1, 3 and 4) or 60 Hz (Experiment 2). We compute the instantaneous HR by  
663 detecting RR intervals from the EKG (Figure 1A). Peaks of the R-wave were found using  
664 *findpeaks* (built-in matlab function). Step 2: The instantaneous HR signal is then interpolated  
665 to keep the same sampling frequency for all subjects (Figure 1B). Step 3: This interpolated  
666 instantaneous HR signal is used to compute an inter-subject correlation matrix by calculating  
667 the Pearson's correlation between each subjects' instantaneous HR signal (Figure 1C). Step  
668 4: Finally, the intersubject subject correlation of heart rate (ISC-HR) for each subject is obtained  
669 by computing the mean of correlations of that given subject to the rest of the group (Figure  
670 1D).

671 For Experiment 2 (Fig 3. and 4) in step 3 we computed the inter-subject correlation matrix  
672 between the instantaneous HR signals in the attentive and distracted conditions with the  
673 instantaneous HR in the attentive conditions rather than within condition. In Experiment 3 (Fig.  
674 5) we again used the instantaneous HR signals obtained when the groups were attentively  
675 listening to the stories as reference when computing the inter-subject correlation matrix for step  
676 3 (Fig. 6.). For Experiment 4 we used the healthy participants as reference in the computation  
677 of the inter-subject correlation matrix in step 3. All other steps were as explained above.

## 678 **Statistical significance of ISC-HR**

679 The instantaneous HR signals for a given epoch are first aligned across subjects. Then ISC-  
680 HR was calculated for all subjects in all epochs and the ISC across epochs. To test whether  
681 the ISC-HR value for each epoch was statistically significant (for Fig. 2A), circular shuffle  
682 statistic was used: Each subject's instantaneous HR is circularly shifted by a random amount  
683 within the 60 second segments and the ISC-HR is re-computed. This procedure is repeated  
684 10.000 times and the ISC-HR of the epoch is compared to this distribution of ISC-HR values  
685 for the circular shifted instantaneous HR signals. The p-value is obtained by counting how  
686 many circular shifted ISC-HR values were below the actual ISC-HR value. For Fig. 2B we  
687 repeat the circular shift to compute ISC-HR values and then average across epochs; p-values  
688 are then computed on these averaged ISC-HR values. For Figure 2C, instead of circular shifts  
689 within 60 s story segments, we instead randomly swapped segments between participants.

690

## 691 **Frequency analysis of heart rate fluctuations**

692 To investigate which time scale the inter-subject correlation and HRV is modulated by attention  
693 we do a frequency analysis of the instantaneous HR signal (Figure 4). The instantaneous HR  
694 signal was band-pass filtered using 5th order butterworth filters with logarithmic spaced center  
695 frequencies with a bandwidth of 0.2 of the center frequency. The ISC was computed in each  
696 frequency band referenced to the attentive group (Fig. 4A). The HRV was computed as the  
697 standard deviation of the instantaneous HR normalized with the average HR (Fig. 4B).

## 698 **Computation of Fractional Anisotropy index (FA index)**

699 Diffusion Tensor Images (DTI) were acquired on a 3T Siemens Skyra scanner (64 diffusion  
700 gradient directions, b value = 1000 s/mm<sup>2</sup>, TR/TE = 3000/80 ms, voxel size = 2x2x2 mm<sup>3</sup>).  
701 DTI data were pre-processed using the FDT package from the Functional MRI of the Brain  
702 (FMRIB) software library (FSL) package 5.01<sup>64</sup>. This consisted of: 1) correcting for motion and  
703 distortions caused by eddy currents; 2) brain segmentation using the brain extraction tool  
704 algorithm; 3) computing the fractional anisotropy (FA) maps using the diffusion-tensor model;  
705 4) registration of the FA and MD maps on the FA template in the standard Montreal  
706 Neurological Institute (MNI) space using linear as well as nonlinear spatial transformations.  
707 FA values were averaged within a deep white-matter mask defined in the MNI space as the  
708 outline of the ICBM-DTI-81 white-matter labels atlas<sup>65</sup>. For each subject, this FA value was  
709 normalised with the mean of FA values measured from 10 healthy volunteers acquired with  
710 the same imaging protocol, such that an average FA index of 1.0 can be considered normal.  
711

## 712 **Acknowledgements**

713 This work was supported by Paris Brain Institute (France); Sorbonne PhD grant ("*recherches*  
714 *interdisciplinaires émergentes*", France) to PP; CARNOT maturation grant, Title: Con&Heart  
715 to JDS; Sorbonne Universités EMERGENCE grant, title: Brain-body interactions, a new  
716 window for conscious evaluation in brain-injured patients to JDS; French embassy UK –  
717 Seeding Grant 2018 to JDS and DC; Medical Research Council New Investigator Research  
718 Grant (UK) to DC; National Science Foundation grant DRL-1660548 supported JM and LP.  
719

720

## 721 Supplementary materials

### 722 Analysis of mean HR and HRV for experiment 1

723 For experiment 1 we also checked whether mean HR or HR variability (HRV) differed between  
724 story segments or between subjects (Fig. S1A and S1B). ANOVA with segment as fixed effect  
725 and subject as random effects shows that mean and standard deviation of HR differed between  
726 segments (HR:  $F(15,390)=2.46$ ,  $p=1.89e-03$ , HRV:  $F(15,390)=1.73$ ,  $p=4.26e-02$ ), and between  
727 subjects (HR:  $F(26,390)=316.92$ ,  $p=2.93e-244$ , HRV:  $F(26,390)=13.52$ ,  $p=4.92e-40$ ). We did  
728 not see a relationship between HR-ISC and mean HR (Fig. S1C,  $r(25)=0.31$ ,  $p=0.11$ ), or  
729 between HR-ISC and HRV (Fig. S1D,  $r(25)=-0.06$ ,  $p=0.78$ ).

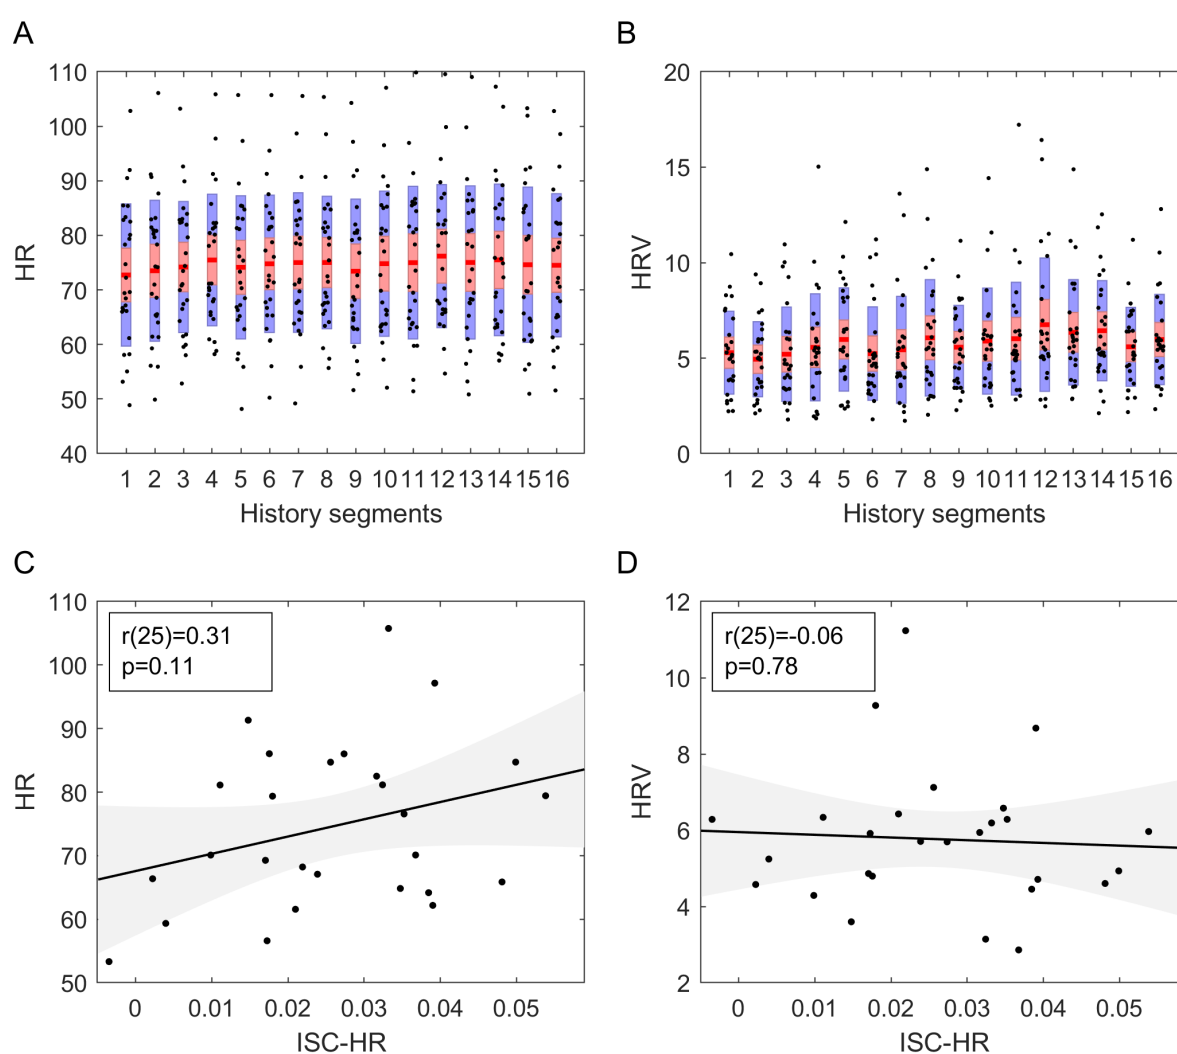

730 **Supplementary Figure 1:** **A:** The instantaneous heart rate shows no modulation across  
731 epochs (Anova  $F(15,390) = 1.04$ ,  $p = 0.41$ ), but differences across subjects (Anova  
732  $F(26,390)=173.88$ ,  $p=0$ ). **B:** Heart rate variability measured as the standard deviation across  
733 the instantaneous heart rate for each segment.  
734 **C:** ISC-HR for each subject averaged across segments versus corresponding mean HR (each  
735 subject is a dot). We found no linear relationship between these two variables.  
736

737 **D:** ISC-HR for each subject averaged across segments versus corresponding HR variability  
738 (each subject is a dot). We found no linear relationship between these two variables.

739

740

#### 741 **Analysis of mean HR and HRV for experiment 2**

742 For experiment 2, in addition to the attentional effects reported in the main results section, we  
743 also checked whether mean HR or HR variability differed between each educational video and  
744 between subjects (Fig. S2A and S2B). ANOVA with video as fixed effect and subject as random  
745 effects shows that mean HR differed across videos (HR:  $F(4,211)=3.05$ ,  $p=1.81e-02$ ), but not  
746 standard deviation ( $F(4,211)=0.77$ ,  $p=5.44e-01$ ), and both differed significantly between  
747 subjects (HR:  $F(23,211)=89.19$ ,  $p=1.87e-95$ , HRV:  $F(23,211)=29.56$ ,  $p=1.57e-53$ ). We did not  
748 see a relationship between ISC-HR and mean HR (Fig. S2C, Attentive:  $r(25)=-0.16$ ,  $p=0.43$ ,  
749 Distracted:  $r(25)=0.21$ ,  $p=0.29$ ) or between ISC-HR and HRV (Fig. S2D, Attentive:  $r(22)=0.15$ ,  
750  $p=0.48$ , Distracted:  $r(22)=0.21$ ,  $p=0.46$ ).

751

752

753

754

755



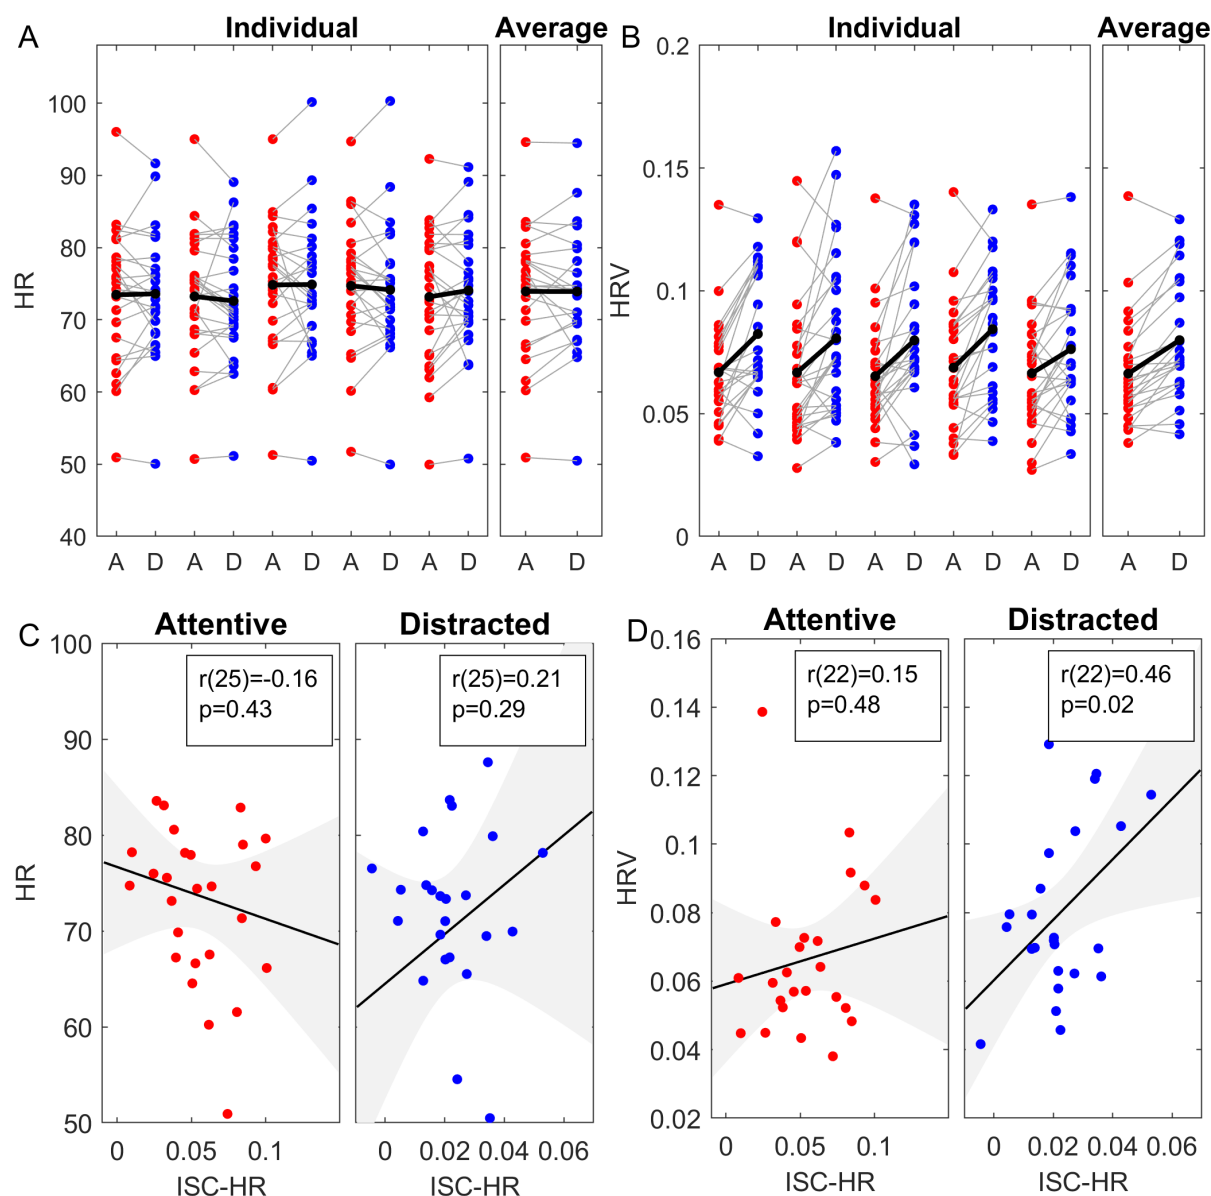

756  
757  
758  
759  
760

**Supplementary figure 2: A:** mean HR, **B:** HRV, **C:** correlation of ISC with HR. **D:** correlation of ISC with HRV

### 761 Behavioral results of experiment 3

762 For experiment 3, we checked the modulation of memory performance in the attentive and  
763 distracted condition like a proof that the task was correctly completed. After each story,  
764 subjects answered 5 short questions about the story content testing their memory performance  
765 (i.e name of protagonist?, place?...). Memory performance was significantly higher in the  
766 attentive condition than in the distracted condition (Figure S3, Wilcoxon signed-rank test:  $z =$   
767  $4.03$ ,  $p = 5.6789e-05$ ). In none of the conditions we found a difference between group 1 and 2  
768 in terms of memory performance. In both groups the performance was always similar, in the  
769 attentive condition (Median group 1 = 90; Median group 2 = 90; Mann-Whitney U test,  $U = 93$ ,  
770  $p = 0.67$ ), in the distracted condition (Median group 1 = 40; Median group 2 = 30; Mann-Whitney  
771 U test,  $U = 106$ ,  $p = 0.66$ ), or in the contrast between the attentive and distracted conditions  
772 (Median group 1 = 40; Median group 2 = 65; Mann-Whitney U test,  $U = 86.5$ ,  $p = 0.39$ )

773

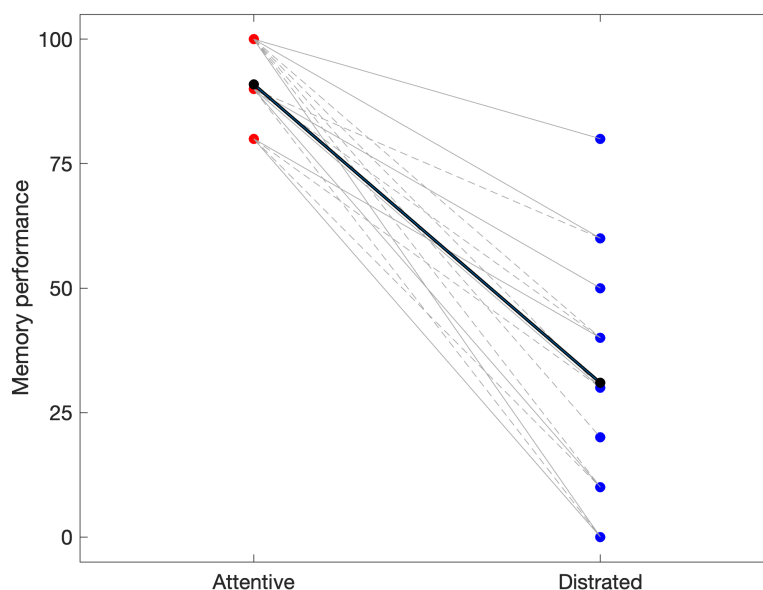

774

775

776 **Supplementary figure 3: Behavioral responses attentive and distracted conditions (n=21).** Solid  
777 lines correspond to subjects in group 1 and dashed lines to subjects in group 2. Each group listened to  
778 2 two stories in the attentive condition and two in the distracted condition.

779 Subjects answered 5 short questions about each story content. The memory performance (rate of good  
780 response) was systematically higher in the attentive condition compared to the distracted conditions.

781 We observed no differences in memory performance between groups.

782

### 783 **Analysis of mean HR and HRV for experiment 3**

784 For experiment 3 we also checked whether mean HR or HR variability differed between each  
785 condition and between subjects. We found that the mean HR was significantly higher in the  
786 distracted condition compared to the attentive condition (Fig S4A, paired t-test,  $t(21) = 7.32$ ,  $p$   
787  $= 4.5e-7$ ). We found no differences in HRV between the attentive and distracted conditions  
788 (Fig S4B, paired t-test,  $t(21) = 1.64$ ,  $p = 0.12$ ).

789 We also did not see a relationship between ISC-HR and mean HR (Fig. S4C, Attentive:  $r(19)=-$   
790  $0.08$ ,  $p=0.74$ , Distracted:  $r(19)=-0.39$ ,  $p=0.08$ ) or between ISC-HR and HRV (Fig. S3D,  
791 Attentive:  $r(19)=0.04$ ,  $p=0.86$ , Distracted:  $r(19)=-0.09$ ,  $p=0.70$ ).

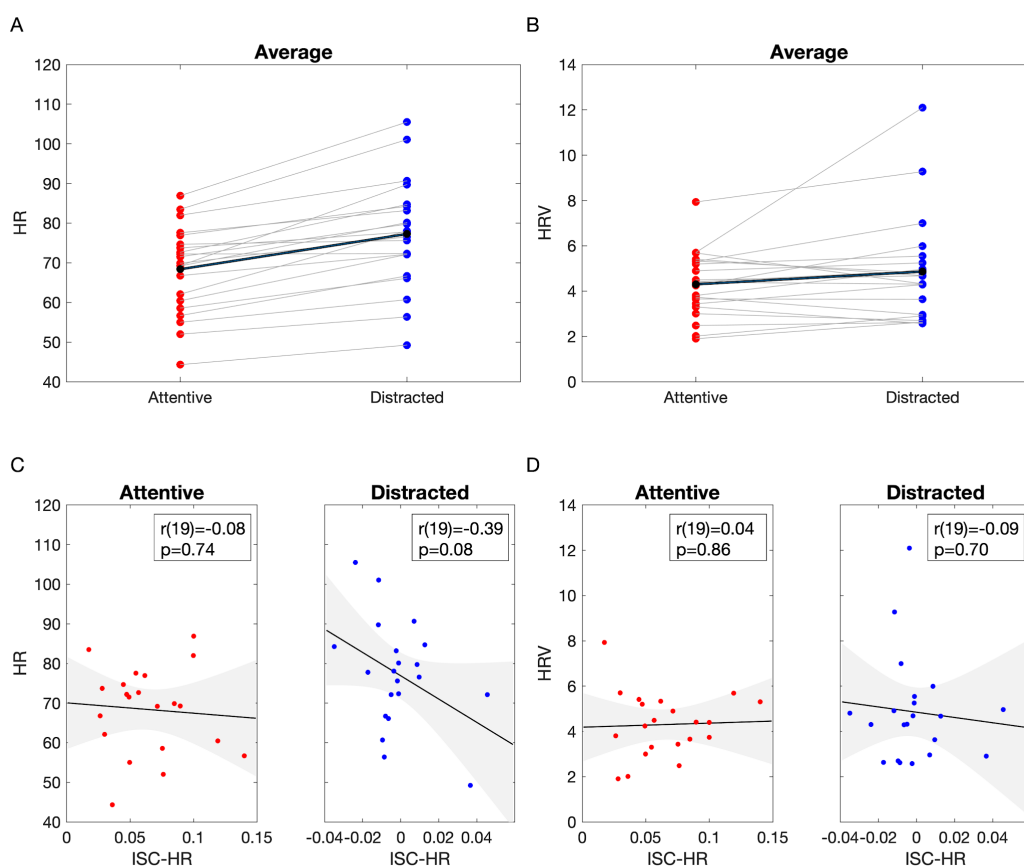

792

793 **Supplementary figure 4: A:** mean HR, **B:** HRV, **C:** correlation of ISC with HR in the attentive  
794 condition (left), and distracted condition (right), **D:** correlation of ISC with HRV in the attentive  
795 condition (left), and distracted condition (right)

796

797

798

799

800

801

802

803

804

805

806

807

808

809

810

### 811 **Respiration and HR and for experiment 3**

812 Breathing is known to be a determinant of the heart rate. We checked whether the  
813 synchronization of respiration between subjects was modulated by the attentive/distracted  
814 conditions. We showed no difference of ISC respiration between both conditions (Fig S5A,

815 paired t-test,  $t(21)=0.5$ ,  $p=0.6$ ), in addition none of the subjects had significant individual ISC  
816 value in either condition.

817 However, we tested if breathing cycle correlates with HR for each subject (Individual Pearson  
818 correlation between displacement of the chest sensor and instantaneous HR), and if this  
819 correlation is modulated by the attentional condition (Fig. S5B). The phase of breathing cycle  
820 and HR were significantly correlated (one-sample t-test averaging the coupling of each  
821 individual in the attentive and distracted conditions,  $t(20)=4.49$ ,  $p=2e-4$ ). However, the  
822 difference in coupling between the attentive and distracted conditions did not reach significance  
823 (paired t-test between attentive and distracted conditions:  $t(20)=1.86$ ,  $p=0.08$ ). Permutation  
824 tests, shuffling the temporal relationship between HR and respiration time-series of each  
825 individual indicated that 11 out of the 21 subjects (both in the attentive and distracted  
826 conditions) showed individually significant HR-Respiratory correlation (FDR corrected,  $p$   
827  $<0.01$ ).

828

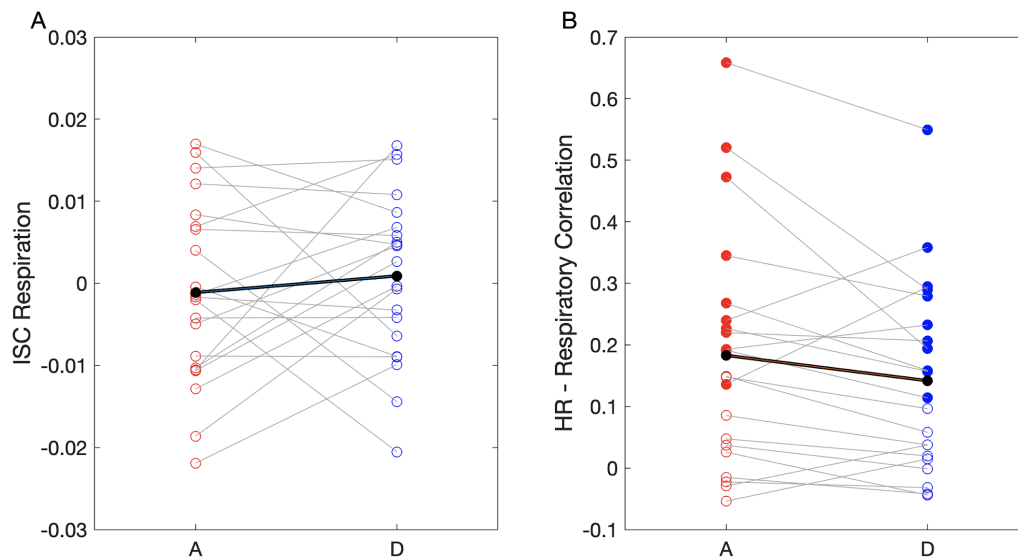

829

830

831 **Supplementary figure 5:** (A) ISC of respiration shows no significant changes of ISC between  
832 attentive and distractive conditions. (B) HR-Respiratory cycle coupling was significant for each  
833 subject represented by the filled circles ( $p < 0.005$ ), attention and distractive conditions did not  
834 modulate the HR-Respiratory cycle coupling (paired t-test:  $t(20)=1.86$ ,  $p=0.08$ ).

835 Filled and empty circles indicate subject-level significant and non-significant respectively (FDR  
836  $p < 0.01$  permutation statistics, shuffling the temporal relationship between HR and respiration  
837 time-series)

838

839

#### 840 **Analysis of mean HR and HRV for experiment 4**

841 For experiment 4 we also checked whether mean HR or HR variability differed between the  
842 different states of consciousness (Fig. S6). The mean HR of DoC patients was significantly  
843 higher than healthy participants (Fig S6A,  $t(41) = 4.7$ ,  $p = 2.9e-05$ ). To test if HR changed with

844 the state-of-consciousness among the DoC patients we performed a Spearman correlation  
845 between state-of-consciousness (Coma = 1, VS = 2, MCS- = 2, MCS+ = 3, EMCS = 4) and HR  
846 and found no significant correlation ( $R(17) = -0.18$ ,  $p = 0.45$ ). Similar for the HR variability, HRV  
847 was significantly higher in DoC patients compared to healthy controls (Fig S6B,  $t(41) = 2.34$ ,  $p$   
848  $= 0.02$ ). We found no significant relationship between the patients' state-of-consciousness and  
849 HRV (Spearman correlation,  $R(17) = 0.41$ ,  $p = 0.08$ ).

850 We also controlled the relationships between HR and ISC, and HRV and ISC for patients. In  
851 none of the cases the relationship was significant (Fig. S6C, HR versus ISC,  $r(17)=0.08$ ,  
852  $p=0.74$ ; Fig. S6D,  $r(17)=-0.4$ ,  $p=0.09$ ).

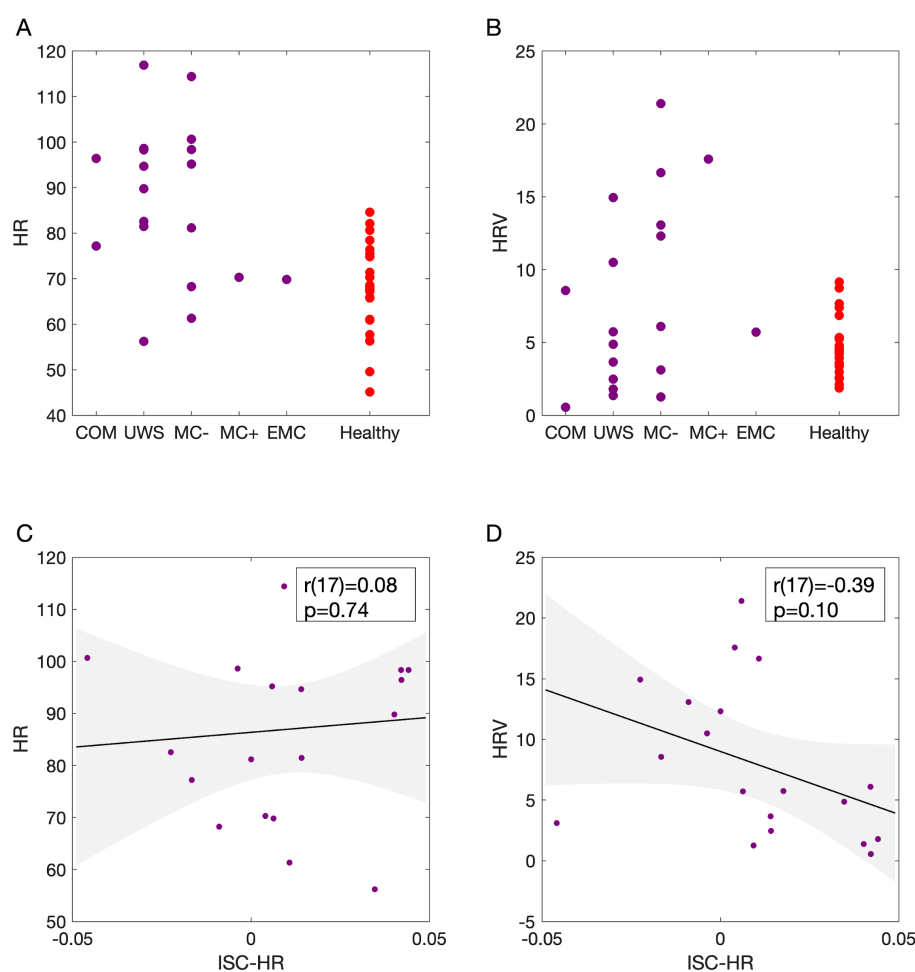

853

854 **Supplementary figure 6: A:** mean HR for DoC patients and healthy participants (Note that  
855 DoC patients are ordered in individual columns corresponding to their clinical state-of-  
856 consciousness (1=Coma, 2=VS/UWS, 3=MCS-, 4=MCS+, and 5=EMCS) **B:** HRV, idem to A  
857 **C:** correlation of ISC with HR for DoC patients. **D:** correlation of ISC with HRV for DOC patients.

858

859

860

861

862

| Subject | Sex | Age (years) | Etiology                   | Delay (days) | State | CRS-R | FA         | Outcome   |
|---------|-----|-------------|----------------------------|--------------|-------|-------|------------|-----------|
| 1       | M   | 71          | Acute Polyradiculoneuritis | 12           | Coma  | 0     | no exam    | VS/Death* |
| 2       | F   | 77          | Meningitis                 | 86           | Coma  | 2     | no exam    | VS        |
| 3       | M   | 18          | TBI+Anoxia                 | 170          | VS    | 5     | 0.756      | VS        |
| 4       | M   | 29          | TBI+Anoxia                 | 510          | VS    | 5     | artefacted | VS        |
| 5       | M   | 29          | Anoxia                     | 556          | VS    | 5     | 0.492      | VS        |
| 6       | M   | 55          | TBI                        | 27           | VS    | 6     | artefacted | MCS+      |
| 7       | F   | 53          | Anoxia                     | 328          | VS    | 5     | 0.824      | VS        |
| 8       | F   | 24          | TBI                        | 68           | VS    | 5     | 0.644      | MCS-      |
| 9       | F   | 63          | Anoxia                     | 41           | VS    | 5     | 0.642      | VS        |
| 10      | M   | 18          | Anoxia                     | 59           | VS    | 4     | 0.792      | VS/Death* |
| 11      | F   | 50          | Anoxia                     | 5852         | MCS-  | 10    | 0.698      | MCS-      |
| 12      | M   | 26          | Status Epilepticus         | 209          | MCS-  | 9     | 0.561      | MCS+      |
| 13      | M   | 50          | Anoxia                     | 60           | MCS-  | 7     | 0.85       | EMCS      |
| 14      | F   | 61          | Status Epilepticus         | 90           | MCS-  | 10    | noDTI      | MCS-      |
| 15      | M   | 58          | Anoxia                     | 302          | MCS-  | 14    | 0.548      | MCS-      |
| 16      | M   | 56          | TBI                        | 478          | MCS-  | 11    | 0.824      | MCS-*     |
| 17      | F   | 36          | Left hematoma              | 121          | MCS-  | 12    | noDTI      | EMCS      |
| 18      | F   | 49          | TBI                        | 980          | MCS+  | 13    | noDTI      | MCS+      |
| 19      | M   | 28          | Status Epilepticus         | 313          | EMCS  | 14    | no exam    | EMCS      |

863

864 **Description of patient cohort:** summary table including patients with sex, age, etiology of  
 865 brain lesion, delay between brain lesion and the evaluation, state of consciousness, CRS-R  
 866 (Coma Recovery Scale-Revised), Fractional anisotropy (FA) from MRI and outcome.  
 867 \*Outcome collected before 6 months.

868
